# Supplementary material for: Germline pathogenic variants in HNRNPU are associated with alterations in blood methylome
Source: PubMed Central journal article supplement (PMC10474128; doi:10.1038/s41431-023-01422-9), 2023-07-05
Supplement: 41431_2023_1422_MOESM1_ESM.pdf [file 41431_2023_1422_MOESM1_ESM.pdf]

[Supplementary Table 1] Sequencing reads and coverage

| <b>Sample</b>    | <b>Total reads processed</b> | <b>Number of mapped reads<br/>(bismarkcov)</b> |
|------------------|------------------------------|------------------------------------------------|
| <b>Patient 1</b> | 33,864,153                   | 9,476,634                                      |
| <b>Patient 2</b> | 54,583,274                   | 11,312,506                                     |
| <b>Patient 3</b> | 19,416,856                   | 8,915,639                                      |
| <b>Patient 4</b> | 46,392,754                   | 15,680,389                                     |
| <b>Patient 5</b> | 48,211,581                   | 9,990,357                                      |
| <b>Patient 6</b> | 34,989,055                   | 9,476,001                                      |
| <b>Patient 7</b> | 51,053,405                   | 11,073,213                                     |
